# Supplementary material for: From tetraphenylethene to tetranaphthylethene: structural evolution in AIE luminogen continues
Source: Royal Society of Chemistry journal article supplement (doi:10.1039/c3cc00010a), 2013-01-01
Supplement: c3cc00010a.pdf [file c3cc00010a.pdf]

*Electronic Supplementary Information (ESI)*

**From tetraphenylethene to tetranaphthylethene: structural evolution in AIE luminogen continues**

Jian Zhou,<sup>a</sup> Zhengfeng Chang,<sup>a</sup> Yibin Jiang,<sup>c</sup> Bairong He,<sup>a</sup> Man Du,<sup>a</sup> Ping Lu,<sup>d</sup> Yuning Hong,<sup>b</sup> Hoi Sing Kwok,<sup>c</sup> Anjun Qin,<sup>e</sup> Huayu Qiu,<sup>a</sup> Zujin Zhao,<sup>\*a</sup> and Ben Zhong Tang<sup>\*b</sup>

<sup>a</sup> *College of Material, Chemistry and Chemical Engineering, Hangzhou Normal University, Hangzhou 310036, China*

<sup>b</sup> *Department of Chemistry, Institute for Advanced Study, State Key Laboratory of Molecular Neuroscience and Institute of Molecular Functional Materials, The Hong Kong University of Science & Technology, Clear Water Bay, Kowloon, Hong Kong, China*

<sup>c</sup> *Center for Display Research, The Hong Kong University of Science & Technology, Kowloon, Hong Kong, China*

<sup>d</sup> *State Key Laboratory of Supramolecular Structure and Materials, Jilin University, Changchun 130012, China*

<sup>e</sup> *Department of Polymer Science and Engineering, Zhejiang University, Hangzhou 310027, China*

*General*

THF was distilled from sodium benzophenone ketyl under dry nitrogen immediately prior to use. 2-Naphthyl phenyl ketone, 2,2'-dinaphthyl ketone and all other chemicals and reagents were purchased from J & K Chemical Technology. <sup>1</sup>H and <sup>13</sup>C NMR spectra were measured on a Bruker AV 400 spectrometer in deuterated chloroform or dichloromethane using tetramethylsilane (TMS;  $\delta = 0$ ) as internal reference. Elemental analysis was performed on an Elementary Vario EL analyzer. UV spectra were measured on a Milton Roy Spectronic 3000 Array spectrophotometer. Photoluminescence was recorded on a Perkin-Elmer LS 55 spectrofluorometer. High resolution mass spectra were recorded on a GCT premier CAB048 mass spectrometer operating in a MALDI-TOF mode. Thermogravimetric analysis was carried on a TA TGA Q5000 under dry nitrogen at a heating rate of 10 °C/min. Thermal transitions were investigated by

differential scanning calorimetry using a TA DSC Q1000 under dry nitrogen at a heating rate of 10 °C/min.

#### *Device fabrication*

The devices were fabricated on 80 nm-ITO coated glass with a sheet resistance of 25Ω/□. Prior to load into the pretreatment chamber, the ITO-coated glasses were soaked in ultrasonic detergent for 30 min, followed by spraying with de-ionized water for 10 min, soaking in ultrasonic de-ionized water for 30 min, and oven-baking for 1 h. The cleaned samples were treated by perfluoromethane (CF<sub>4</sub>) plasma with a power of 100 W, gas flow of 50 sccm, and pressure of 0.2 Torr for 10 s in the pretreatment chamber. The samples were transferred to the organic chamber with a base pressure of  $7 \times 10^{-7}$  Torr for the deposition of *N,N*-bis(1-naphthyl)-*N,N*-diphenylbenzidine (NPB), emitter, 2,2',2''-(1,3,5-benzinetriyl)tris(1-phenyl-1-*H*-benzimidazole) (TPBI), which served as hole-transporting, light-emitting, hole-blocking, and electron-transporting layers, respectively. The samples were then transferred to the metal chamber for cathode deposition which composed of lithium fluoride (LiF) capped with aluminum (Al). The light-emitting area was 4 mm<sup>2</sup>. The current density-voltage characteristics of the devices were measured by a HP4145B semiconductor parameter analyzer. The forward direction photons emitted from the devices were detected by a calibrated UDT PIN-25D silicon photodiode. The luminance and external quantum efficiency of the device were inferred from the photocurrent of the photodiode. The electroluminescence spectra were obtained by a PR650 spectrophotometer. All measurements were carried out under air at room temperature without device encapsulation.

#### *Preparation of nanoaggregates*

Stock THF solutions of the luminogens with a concentration of 10<sup>-4</sup> M were prepared. Aliquots of the stock solution were transferred to 10 mL volumetric flasks. After appropriate amounts of THF were added, water was added dropwise under vigorous stirring to furnish 10<sup>-5</sup> M solutions with different water contents. The PL measurements of the resultant solutions were then performed immediately.

#### *Synthesis*

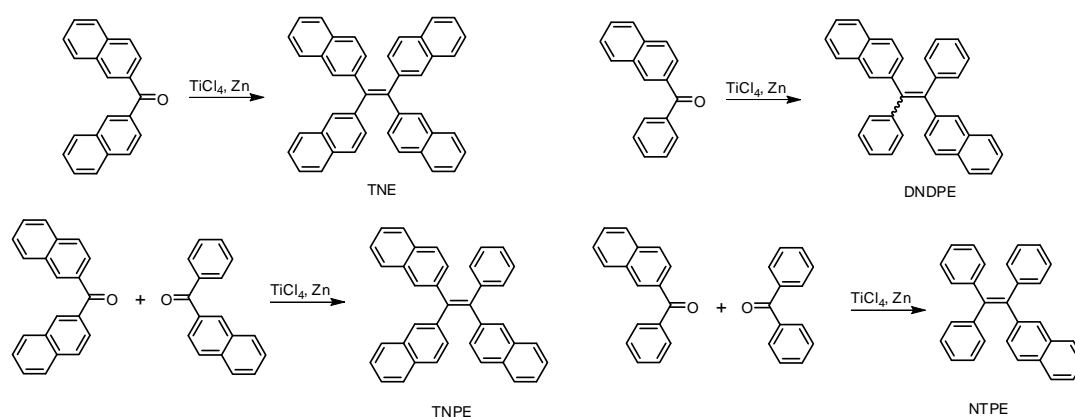

**Scheme S1** Synthetic routes to naphthalene-substituted ethenes.

**Tetra(naphthalen-2-yl)ethene (TNE):** To a solution of 2,2'-dinaphthyl ketone (1.4 g, 5 mmol), zinc dust (0.78 g, 12 mmol) in 80 mL dry THF was added dropwise titanium(IV) chloride (1.15 g, 6 mmol) under nitrogen at  $-78\text{ }^{\circ}\text{C}$ . After stirring for 20 min, the reaction mixture was warmed to room temperature and then heated to reflux for 12 h. The reaction mixture was cooled to room temperature and poured into water. The organic layer was extracted with dichloromethane and the combined organic layers were washed with saturated brine solution and water, and dried over anhydrous magnesium sulfate. After filtration and solvent evaporation, the residue was purified by silica-gel column chromatography using hexane/dichloromethane as eluent. Pale yellow solid of TNE was obtained in 48% yield (0.64 g).  $^1\text{H}$  NMR (400 MHz,  $\text{CDCl}_3$ ),  $\delta$ (TMS, ppm): 7.73 (d, 4H,  $J = 8.0$  Hz), 7.64 (s, 4H), 7.58–7.54 (m, 8H), 7.43–7.35 (m, 8H), 7.30 (d, 4H,  $J = 9.2$  Hz).  $^{13}\text{C}$  NMR (100 MHz,  $\text{CDCl}_3$ ),  $\delta$ (TMS, ppm): 141.7, 141.5, 133.2, 132.2, 130.9, 129.8, 128.1, 127.5, 127.2, 125.9, 125.8. HRMS:  $m/z$  532.2191 ( $\text{M}^+$ , calcd 532.2191). Anal. Calcd for  $\text{C}_{42}\text{H}_{28}$ : C, 94.70; H, 5.30. Found: C, 94.63; H, 5.24%.

**Tri(naphthalen-2-yl)phenylethene (TNPE):** The procedure was analogous to that described for TNE. Pale yellow solid of TNPE was obtained in 24 % yield.  $^1\text{H}$  NMR (400 MHz,  $\text{CDCl}_3$ ),  $\delta$ (TMS, ppm): 7.78 (d, 1H,  $J = 7.6$  Hz), 7.73 (d, 2H,  $J = 7.2$  Hz), 7.63–7.54 (m, 9H), 7.47–7.35 (m, 6H), 7.29–7.26 (m, 3H), 7.19–7.17 (m, 2H), 7.13–7.12 (m, 3H).  $^{13}\text{C}$  NMR (100 MHz,  $\text{CDCl}_3$ ),  $\delta$ (TMS, ppm): 143.9, 141.9, 141.6, 141.4, 141.2, 133.2, 132.2, 131.7, 130.8, 130.7, 129.7, 129.6, 128.1, 127.9, 127.5, 127.2, 127.1, 127.0, 126.7, 125.8, 125.7. HRMS:  $m/z$  482.2031 ( $\text{M}^+$ , calcd 482.2035). Anal. Calcd for  $\text{C}_{38}\text{H}_{26}$ : C, 94.57; H, 5.43. Found: C, 94.51; H, 5.24%.

**Di(naphthalen-2-yl)-1,2-diphenylethene (DNDPE):** The procedure was analogous to that described for TNE. Pale yellow solid of DNDPE was obtained in 65% yield.  $^1\text{H}$  NMR (400 MHz,  $\text{CDCl}_3$ ),  $\delta$  (TMS, ppm): 7.63–7.56 (m, 2H), 7.50–7.38 (m, 6H), 7.32–7.20 (m, 4H), 7.13–7.09 (m, 2H), 7.02–6.97 (m, 10H).  $^{13}\text{C}$  NMR (100 MHz,  $\text{CDCl}_3$ ),  $\delta$  (TMS, ppm): 144.0, 143.8, 141.5, 141.4, 141.3, 133.2, 132.2, 131.6, 130.6, 129.6, 128.1, 127.9, 127.8, 127.5, 127.1, 127.0, 126.7, 126.6, 125.8, 125.7. HRMS:  $m/z$  432.1872 ( $\text{M}^+$ , calcd 432.1878). Anal. Calcd for  $\text{C}_{34}\text{H}_{24}$ : C, 94.41; H, 5.59. Found: C, 94.36; H, 5.52%.

**Naphthalen-2-yltriphenylethene (NTPE):** The procedure was analogous to that described for TNE. Pale yellow solid of TNPE was obtained in 32% yield.  $^1\text{H}$  NMR (400 MHz,  $\text{CDCl}_3$ ),  $\delta$  (TMS, ppm): 7.71 (d, 1H,  $J = 8.0$  Hz), 7.58–7.53 (m, 2H), 7.49 (s, 1H), 7.40–7.33 (m, 2H), 7.15 (d, 1H,  $J = 8.4$  Hz), 7.10 (br, 6H), 7.06 (br, 9H).  $^{13}\text{C}$  NMR (100 MHz,  $\text{CDCl}_3$ ),  $\delta$  (TMS, ppm): 143.8, 143.6, 141.5, 141.3, 140.8, 133.2, 132.1, 131.5, 131.4, 130.5, 129.5, 127.8, 127.7, 127.5, 126.9, 126.5, 125.7. HRMS:  $m/z$  382.1742 ( $\text{M}^+$ , calcd 382.1722). Anal. Calcd for  $\text{C}_{30}\text{H}_{22}$ : C, 94.20; H, 5.80. Found: C, 94.11; H, 5.65%.

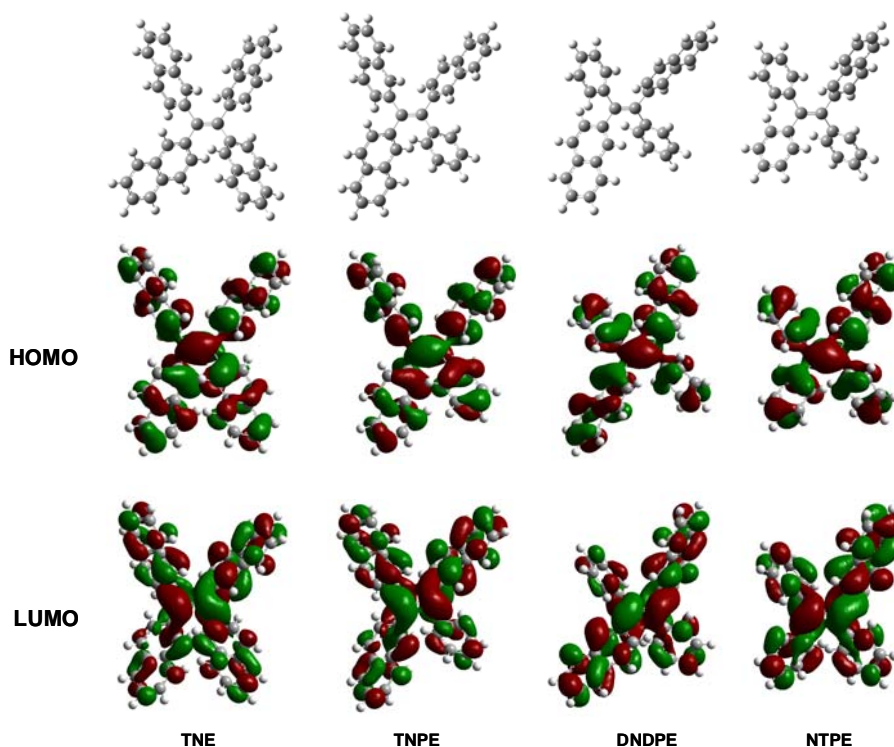

**Fig. S1** Optimized molecular structures, and molecular orbital amplitude plots of HOMO and LUMO of naphthalene-substituted ethenes calculated using B3LYP/6-31G(d) basis set.

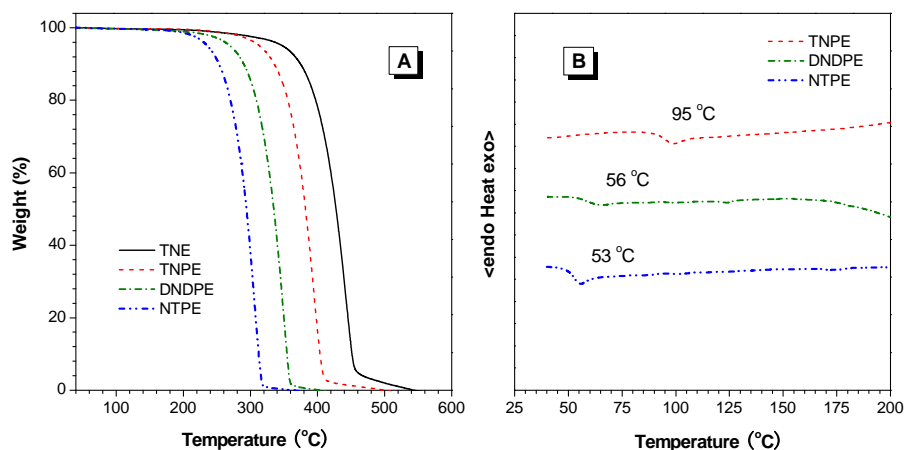

**Fig. S2** (A) TGA thermograms and (B) DSC curves (second heating scan) of naphthalene-substituted ethenes recorded under nitrogen at a heating rate of 10 °C min<sup>-1</sup>.

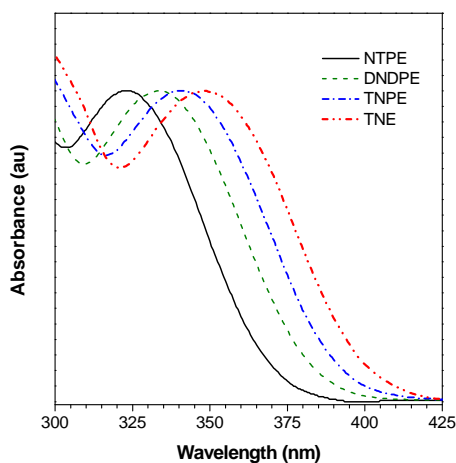

**Fig. S3** Absorption spectra of naphthalene-substituted ethenes in THF solutions.

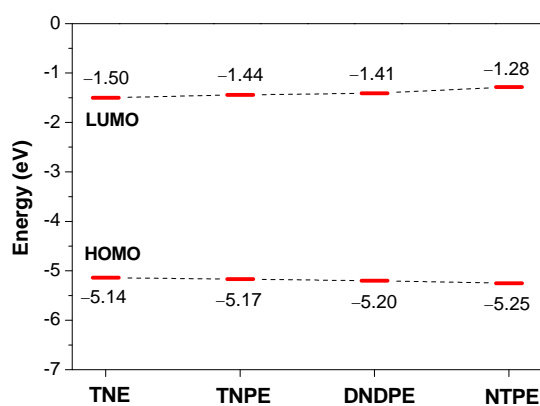

**Fig. S4** Calculated HOMO and LUMO energy levels of naphthalene-substituted ethenes using B3LYP/6-31G(d) basis set.

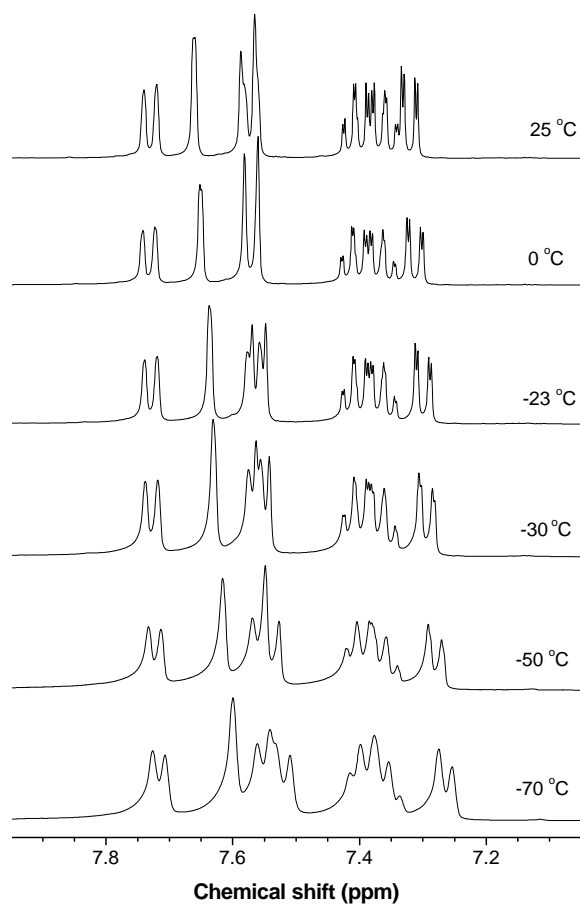

**Fig. S5**  $^1\text{H}$  NMR spectra of TNE in dichloromethane- $d_2$  at different temperatures.

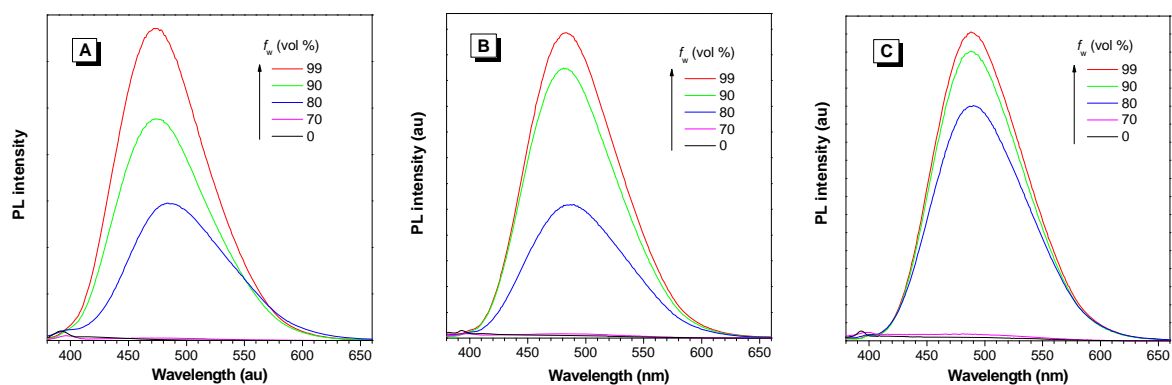

**Fig. S6** PL spectra of (A) NTPE, (B) DNDPE and (C) TNPE in THF/water mixtures with different water fraction ( $f_w$ ).

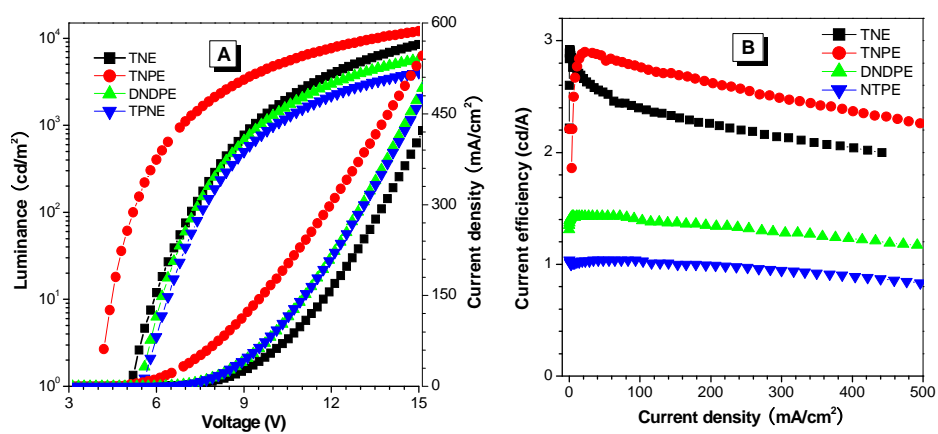

**Fig. S7** Plots of (A) luminance and current density with the applied voltage and (B) current efficiency versus current density in EL devices based on naphthalene-substituted ethenes.
